# Supplementary material for: Nitrogen-modified biomass-derived cheese-like porous carbon for electric double layer capacitors
Source: Royal Society of Chemistry journal article supplement (doi:10.1039/c6ra02748b), 2016-01-01
Supplement: c6ra02748b1.pdf [file c6ra02748b1.pdf]

# Nitrogen-modified biomass-derived cheese-like porous carbon for electric double layer capacitors

Keliang Wang<sup>a</sup>, Yuhe Cao<sup>a</sup>, Zhengrong Gu<sup>1,\*</sup>, Phil Ahrenkiel<sup>c</sup>, Joun Lee<sup>d</sup>, Qi Hua Fan<sup>2,\*</sup>

*a Agricultural and Biosystems Engineering Department, South Dakota State University, Brookings, SD 57007, United States*

*b Electrical Engineering and Computer Science Department, South Dakota State University, Brookings, SD 57007, United States*

*c Nanoscience and Nanoengineering Department, South Dakota School of Mines and Technology, Rapid City, SD 57701, United States*

*d Department of Chemistry, University of Iowa, Iowa City, IA, 52242, United States*

---

<sup>1</sup> Z R. Gu Tel./fax: + 1 605 688 5372. Email address: [zhengrong.gu@sdstate.edu](mailto:zhengrong.gu@sdstate.edu) (Z R. Gu)

<sup>2</sup> Q H. Fan Tel./fax: + 1 605 688-5910. Email address: [qihua.fan@sdstate.edu](mailto:qihua.fan@sdstate.edu) (Q H. Fan)

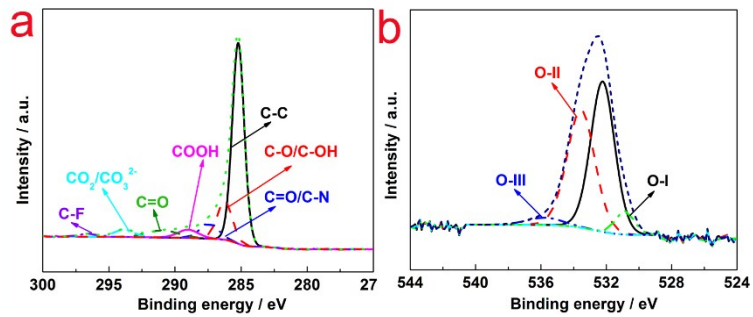

Fig. S1 C 1s (a), and O 1s (b) XPS spectra of L.

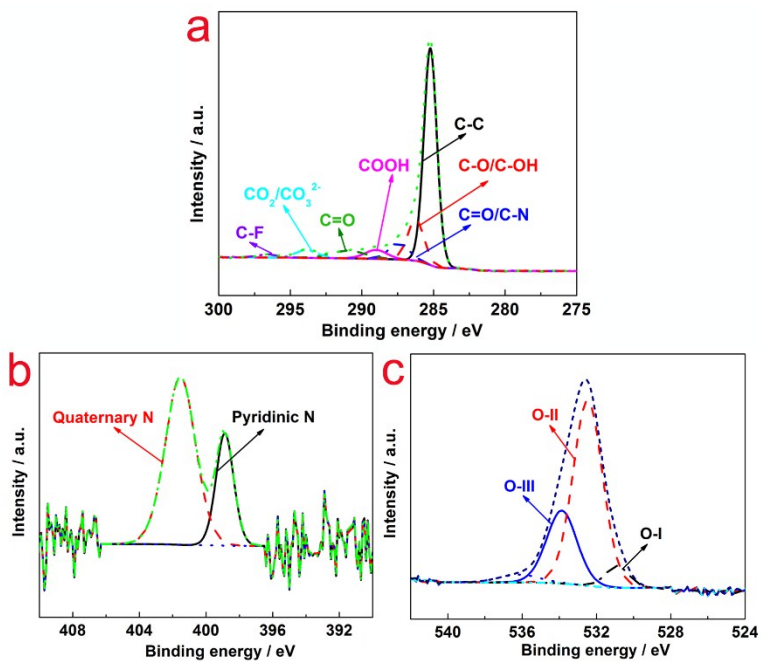

Fig. S2 C 1s (a), N 1s (b) and O 1s (c) XPS spectra of PL.
